# Supplementary material for: Effect of socioeconomic conditions on frequent complaints of pain in children: findings from the UK Millennium Cohort Study
Source: PubMed Central journal article supplement (PMC5862210; doi:10.1136/bmjpo-2017-000093), 2017-08-11

## SUPPLEMENTARY MATERIAL: CONTENTS

|                                                              |   |
|--------------------------------------------------------------|---|
| 1. Outcome measure data in the millennium cohort study ..... | 2 |
| 2. Treatment of variables in analysis .....                  | 3 |
| 3. MCS ethical approval details .....                        | 4 |
| 4. MCS cohort members missing from the analysis .....        | 5 |
| 5. Sensitivity analysis.....                                 | 6 |

## 1. Outcome measure data in the millennium cohort study

The outcome measure formed part of the parent- and teacher-reported Strengths and Difficulties questionnaire in each survey. This tool is not a validated measure of unexplained chronic pain.

**Table 1: Outcome measure data in the millennium cohort study<sup>96-99</sup>**

| Sweep | Age | Section          | Preamble                                                                                                                                                                                                                                                                                                                                                                                | Question                                                                       | Possible answers                                                                       |
|-------|-----|------------------|-----------------------------------------------------------------------------------------------------------------------------------------------------------------------------------------------------------------------------------------------------------------------------------------------------------------------------------------------------------------------------------------|--------------------------------------------------------------------------------|----------------------------------------------------------------------------------------|
| 5     | 1   | Main parent CAPI | Please give your answers on the basis of [^Cohort child's name]'s behaviour over the last six months. Now thinking about [^Cohort child's name].....                                                                                                                                                                                                                                    | [^Cohort child's name] often complains of headaches, stomach-aches or sickness | 1 Not true<br>2 Somewhat true<br>3 Certainly true<br>4 Don't know/Don't wish to answer |
| 4     | 7   | Main parent CAPI | Please give your answers on the basis of [^Cohort child's name]'s behaviour over the last six months. Now thinking about [^Cohort child's name]                                                                                                                                                                                                                                         | [^Cohort child's name] often complains of headaches, stomach-aches or sickness | 1 Not true<br>2 Somewhat true<br>3 Certainly true<br>4 Can't say                       |
| 3     | 5   | Main parent CAPI | Please give your answers on the basis of [^Cohort child's name]'s behaviour over the last six months. Now thinking about [^Cohort child's name]                                                                                                                                                                                                                                         | [^Cohort child's name] often complains of headaches, stomach-aches or sickness | 1 Not true<br>2 Somewhat true<br>3 Certainly true<br>4 Can't say                       |
| 2     | 3   | Main parent CAPI | What's your child like? / What are your twins/triplets like? For each item, please press the appropriate number for 'Not True', 'Somewhat True' or 'Certainly True'. It would help us if you answered all items as best you can even if you are not absolutely certain or the item seems daft! Please give your answers on the basis of the child's behaviour over the last six months. | Often complains of headaches, stomach-aches or sickness                        | 1 Not true<br>2 Somewhat true<br>3 Certainly true<br>4 Can't say                       |

## 2. Treatment of variables in analysis

**Table 2: Protocol extract: Treatment of variables in analysis**

| Variable                                                               | Sweep measured | Categorical / continuous     | Adjustments to be made                                                                                         |
|------------------------------------------------------------------------|----------------|------------------------------|----------------------------------------------------------------------------------------------------------------|
| <b>Outcome measure</b>                                                 |                |                              |                                                                                                                |
| Headache, sickness or stomach ache 'certainly true' or 'somewhat true' | MCS 5          | Categorical                  | None                                                                                                           |
| <b>SECs measures</b>                                                   |                |                              |                                                                                                                |
| Maternal education level                                               | MCS 1          | Categorical                  | Exclude 'other qualifications' category                                                                        |
| <i>NS-SEC (occupational class)</i>                                     | <i>MCS 1</i>   | <i>Categorical</i>           | <i>None. Sensitivity analysis only</i>                                                                         |
| <i>Household income</i>                                                | <i>MCS1</i>    | <i>Categorical</i>           | <i>None. Sensitivity analysis only</i>                                                                         |
| <b>Demographic measures</b>                                            |                |                              |                                                                                                                |
| Sex                                                                    | MCS 1          | Categorical                  | None                                                                                                           |
| Ethnicity                                                              | MCS 1          | Categorical                  | Aggregate to trichotomous variable                                                                             |
| <b>Perinatal health</b>                                                |                |                              |                                                                                                                |
| Pre-term birth                                                         | MCS 1          | Continuous (gestational age) | Convert gestational age to categorical indicator of pre-term birth (<37 weeks)                                 |
| Infant regulatory problems (feeding, sleeping)                         | MCS 1          | Categorical                  | Reduce to dichotomous categorical variable (disagree or strongly disagree that baby eats and sleeps regularly) |
| Crying 'is a problem'                                                  | MCS 1          | Categorical                  | None                                                                                                           |
| <b>Maternal health</b>                                                 |                |                              |                                                                                                                |
| Mother's history of GI disease                                         | MCS 1          | Categorical                  | None                                                                                                           |
| Kessler Scale (proxy for maternal psychiatric illness)                 | MCS 2          | Continuous                   | Convert to a dichotomous categorical variable (<6 "normal", 6+ "distress")                                     |
| Mother's self-reported health                                          | MCS 3          | Categorical                  | None                                                                                                           |
| Mother's bodily pain                                                   | MCS 3          | Categorical                  | None                                                                                                           |
| <b>Child health</b>                                                    |                |                              |                                                                                                                |
| Strengths and Difficulties (SDQ) score                                 | MCS 3          | Continuous                   | Convert to trichotomous categorical variable (0-13 "normal", 14-15 "borderline" 16+ "abnormal")                |
| BMI                                                                    | MCS 4*         | Categorical                  | None                                                                                                           |
| Fruit consumption                                                      | MCS 3          | Categorical                  | None                                                                                                           |

\*BMI was changed to an MCS 4 variable during analysis as children were not weighed and measured as part of survey 3.

### 3. MCS ethical approval details

The MCS team applied for and received NHS ethics approvals prior to each survey of the Millennium Cohort study<sup>77</sup>. Table details the committee applied to and the consent number for each survey.

**Table 3: MCS ethical approval 2000-2008<sup>77</sup>**

| Survey | Age      | Year    | Approval                                                          | Consent number |
|--------|----------|---------|-------------------------------------------------------------------|----------------|
| MCS1   | 9 months | 2000/1  | South West Medical Research Ethics Committee                      | MREC/01/6/19   |
| MCS2   | 3 years  | 2003/4  | London Medical Research Ethics Committee                          | MREC/03/2/022  |
| MCS3   | 5 years  | 2005/6  | London Medical Research Ethics Committee .                        | 05/MRE02/46    |
| MCS4   | 7 years  | 2007/8  | Yorkshire Medical Research Ethics Committee                       | 07/MRE03/32    |
| MCS5   | 11 years | 2011/12 | Yorkshire and The Humber – Leeds East - Research Ethics Committee | 11/YH/0203     |

#### 4. MCS cohort members missing from the analysis

The table below identifies the numbers of children that are identified from the analysis.

Data is presented incrementally, since some children will meet more than one of the exclusion criteria set out in the methods section.

**Table 4: Reasons for exclusion from analysis**

|                                                    | Excluded | Remaining |
|----------------------------------------------------|----------|-----------|
| Total families recruited                           |          | 19244     |
| Exclude twins and triplets                         | 263      | 18981     |
| Include only families recruited at MCS1            | 685      | 18296     |
| Children excluded from MCS survey 5 at age 11      | 2735     | 15561     |
| Loss to follow up                                  | 2919     | 12642     |
| Missing data on maternal education level           | 28       | 12614     |
| Missing data on chronic pain at age 11             | 484      | 12130     |
| Missing data on child sex                          | 0        | 12130     |
| Missing data on ethnicity                          | 21       | 12109     |
| Missing data on period of gestation                | 1178     | 10931     |
| Missing data on regular sleeping and eating        | 248      | 10683     |
| Missing data on problematic crying                 | 151      | 10532     |
| Missing data on mother's mental health (Kessler 2) | 849      | 9683      |
| Missing data on maternal general health            | 1        | 9682      |
| Missing data on maternal bodily pain               | 442      | 9240      |
| Missing data on maternal GI disease                | 1        | 9239      |
| Missing data on child mental health (SDQ)          | 114      | 9125      |
| Missing data on child BMI                          | 534      | 8591      |
| Missing data on child fruit consumption            | 4        | 8587      |
| Maternal education status of 'other'               | 124      | 8463      |

Other than loss to follow-up, the largest exclusions from the analysis related to missing data on the period of gestation and BMI. Weighing and measuring of children in the MCS is subject to an additional parental consent requirement, and the extent of missing data for BMI reflects this consent being withheld in a substantial number of MCS families. Given the importance of GI risks in the RAP literature, BMI is sufficiently important to justify accepting this loss of sample size.

## 5. Sensitivity analysis

**Figure 1: Prevalence of UCP by household income group**

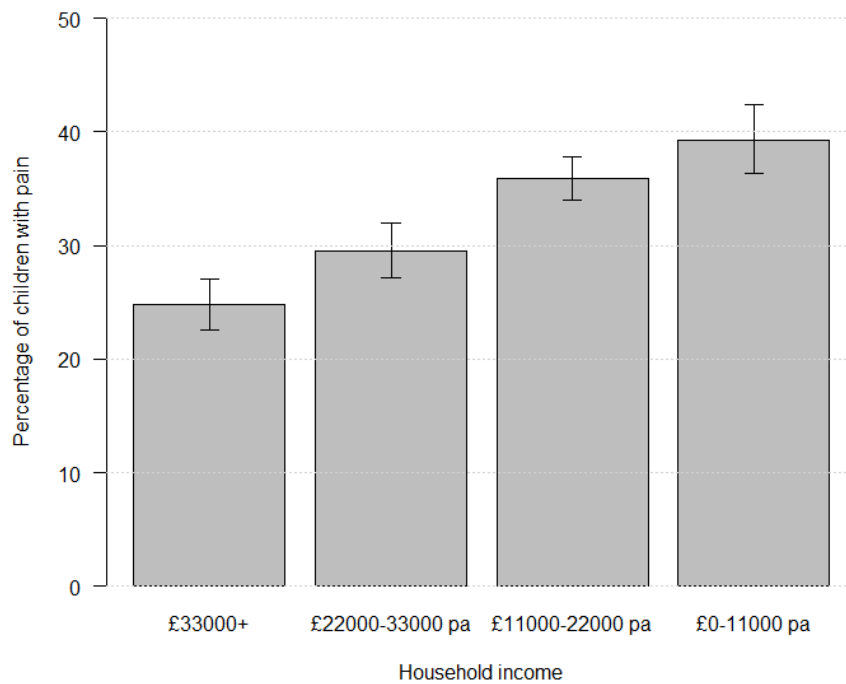

**Figure 2: Prevalence of UCP by highest household occupational group**

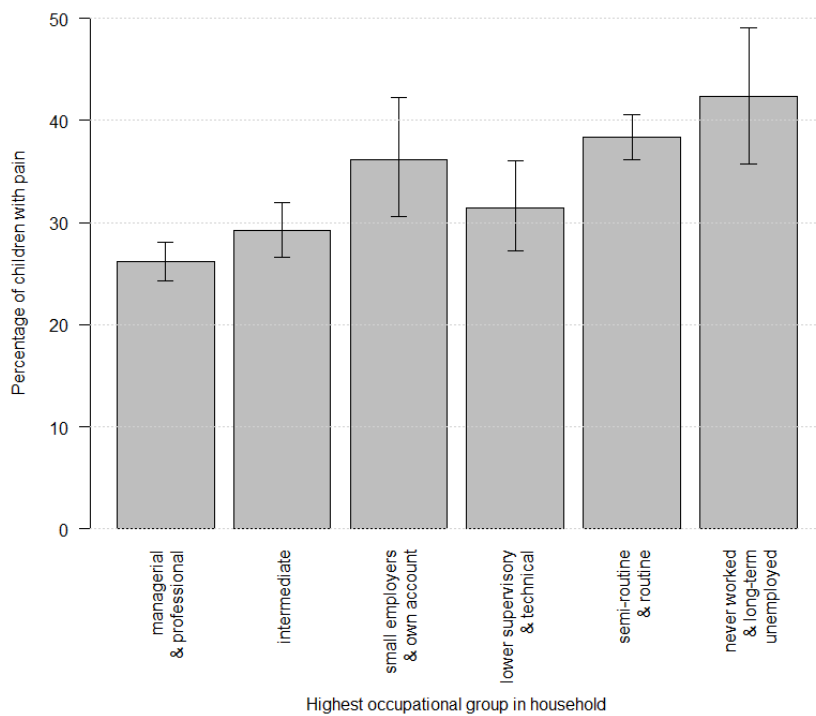

Error bars show 95% CIs around the survey estimates

**Table 5: Results of sensitivity analyses with changes to SECs and UCP variables, showing risk ratios and 95% CIs**

|                                                                    | Univariable |                | Multivariable |                |
|--------------------------------------------------------------------|-------------|----------------|---------------|----------------|
| <b>PARENT REPORTED PAIN CERTAINLY OR SOMEWHAT TRUE</b>             |             |                |               |                |
| Model 1: Maternal education (ref higher degree) n= 8463            |             |                |               |                |
| degree                                                             | 1.16        | (0.93 to 1.44) | 1.21          | (0.98 to 1.50) |
| diploma                                                            | 1.40 **     | (1.10 to 1.78) | 1.38 **       | (1.09 to 1.75) |
| A levels                                                           | 1.35 *      | (1.07 to 1.70) | 1.31 *        | (1.04 to 1.64) |
| GCSE A-C                                                           | 1.59 ***    | (1.29 to 1.95) | 1.46 ***      | (1.19 to 1.80) |
| GCSE D-G                                                           | 1.83 ***    | (1.46 to 2.30) | 1.57 ***      | (1.25 to 1.98) |
| None                                                               | 2.06 ***    | (1.64 to 2.59) | 1.70 ***      | (1.36 to 2.13) |
| Model 2: Household income (ref £30k+) n=8462                       |             |                |               |                |
| £22000-33000 pa                                                    | 1.19 **     | (1.07 to 1.33) | 1.11 *        | (1.00 to 1.23) |
| £11000-22000 pa                                                    | 1.45 ***    | (1.30 to 1.61) | 1.24 ***      | (1.11 to 1.38) |
| £0-11000 pa                                                        | 1.59 ***    | (1.41 to 1.79) | 1.27 ***      | (1.13 to 1.43) |
| Model 3: NS-SEC occupation (ref managerial & professional) n=8549  |             |                |               |                |
| intermediate                                                       | 1.12 *      | (1.00 to 1.24) | 1.06          | (0.95 to 1.17) |
| small employers & own account                                      | 1.38 ***    | (1.16 to 1.65) | 1.33 **       | (1.12 to 1.59) |
| lower supervisory & technical                                      | 1.20 *      | (1.02 to 1.42) | 1.07          | (0.91 to 1.26) |
| semi-routine & routine                                             | 1.47 ***    | (1.34 to 1.61) | 1.24 ***      | (1.13 to 1.36) |
| never worked & long-term unemployed                                | 1.62 ***    | (1.35 to 1.93) | 1.28 **       | (1.07 to 1.54) |
| <b>PARENT REPORTED PAIN CERTAINLY TRUE</b>                         |             |                |               |                |
| Model 4: Maternal education (ref higher degree) n=6275             |             |                |               |                |
| degree                                                             | 1.02        | (0.48 to 2.16) | 1.08          | (0.51 to 2.26) |
| diploma                                                            | 1.30        | (0.61 to 2.78) | 1.23          | (0.58 to 2.61) |
| A levels                                                           | 1.43        | (0.68 to 3.00) | 1.26          | (0.61 to 2.61) |
| GCSE A-C                                                           | 2.13 *      | (1.06 to 4.27) | 1.64          | (0.82 to 3.27) |
| GCSE D-G                                                           | 2.53 *      | (1.18 to 5.42) | 1.50          | (0.69 to 3.23) |
| None                                                               | 3.15 **     | (1.51 to 6.56) | 1.83          | (0.87 to 3.85) |
| Model 5: Household income (ref £30k+) n=6266                       |             |                |               |                |
| £22000-33000 pa                                                    | 1.46 *      | (1.08 to 1.99) | 1.26          | (0.93 to 1.70) |
| £11000-22000 pa                                                    | 2.15 ***    | (1.66 to 2.77) | 1.40 *        | (1.08 to 1.82) |
| £0-11000 pa                                                        | 2.63 ***    | (1.97 to 3.52) | 1.49 *        | (1.09 to 2.04) |
| Model 6: NS-SEC occupation (ref managerial & professional) n= 6335 |             |                |               |                |
| intermediate                                                       | 1.25        | (0.93 to 1.66) | 1.11          | (0.84 to 1.47) |
| small employers & own account                                      | 1.57        | (0.94 to 2.62) | 1.37          | (0.83 to 2.28) |
| lower supervisory & technical                                      | 1.19        | (0.76 to 1.87) | 0.87          | (0.57 to 1.34) |
| semi-routine & routine                                             | 1.86 ***    | (1.45 to 2.39) | 1.20          | (0.94 to 1.53) |
| never worked & long-term unemployed                                | 2.00 **     | (1.19 to 3.37) | 1.10          | (0.68 to 1.80) |

\*\*\*p < 0.001, \*\*p < 0.01, \*p < 0.05

**Table 5 (continued): Results of sensitivity analyses with changes to SECs and UCP variables, showing risk ratios and 95% CIs**

|                                                                   | Univariable |                | Multivariable |                |
|-------------------------------------------------------------------|-------------|----------------|---------------|----------------|
| TEACHER REPORTED PAIN CERTAINLY OR SOMEWHAT TRUE                  |             |                |               |                |
| Model 7: Maternal education (ref higher degree) n= 4910           |             |                |               |                |
| degree                                                            | 1.22        | (0.61 to 2.45) | 1.22          | (0.62 to 2.44) |
| diploma                                                           | 2.12 *      | (1.04 to 4.34) | 1.92          | (0.93 to 3.94) |
| A levels                                                          | 1.76        | (0.84 to 3.67) | 1.63          | (0.79 to 3.36) |
| GCSE A-C                                                          | 2.59 **     | (1.32 to 5.08) | 2.23 *        | (1.14 to 4.35) |
| GCSE D-G                                                          | 2.78 **     | (1.36 to 5.68) | 2.15 *        | (1.05 to 4.37) |
| None                                                              | 4.08 ***    | (1.96 to 8.49) | 3.07 **       | (1.49 to 6.34) |
| Model 9: NS-SEC occupation (ref managerial & professional) n=4958 |             |                |               |                |
| £22000-33000 pa                                                   | 1.46 **     | (1.11 to 1.91) | 1.35 *        | (1.03 to 1.77) |
| £11000-22000 pa                                                   | 1.86 ***    | (1.43 to 2.41) | 1.59 ***      | (1.22 to 2.06) |
| £0-11000 pa                                                       | 2.58 ***    | (1.92 to 3.47) | 2.05 ***      | (1.52 to 2.77) |
| Model 9: NS-SEC occupation (ref managerial & professional) n=4958 |             |                |               |                |
| intermediate                                                      | 1.17        | (0.91 to 1.50) | 1.12          | (0.88 to 1.43) |
| small employers & own account                                     | 1.70 *      | (1.13 to 2.55) | 1.65 *        | (1.11 to 2.45) |
| lower supervisory & technical                                     | 1.55 *      | (1.11 to 2.18) | 1.37          | (0.98 to 1.90) |
| semi-routine & routine                                            | 1.69 ***    | (1.37 to 2.09) | 1.40 **       | (1.13 to 1.75) |
| never worked & long-term unemployed                               | 2.65 ***    | (1.78 to 3.93) | 2.16 ***      | (1.44 to 3.23) |

\*\*\*p < 0.001, \*\*p < 0.01, \*p < 0.05



**Figure 3: Plot of unadjusted and fully adjusted effect sizes in sensitivity analyses with changes to SECs and UCP variables**

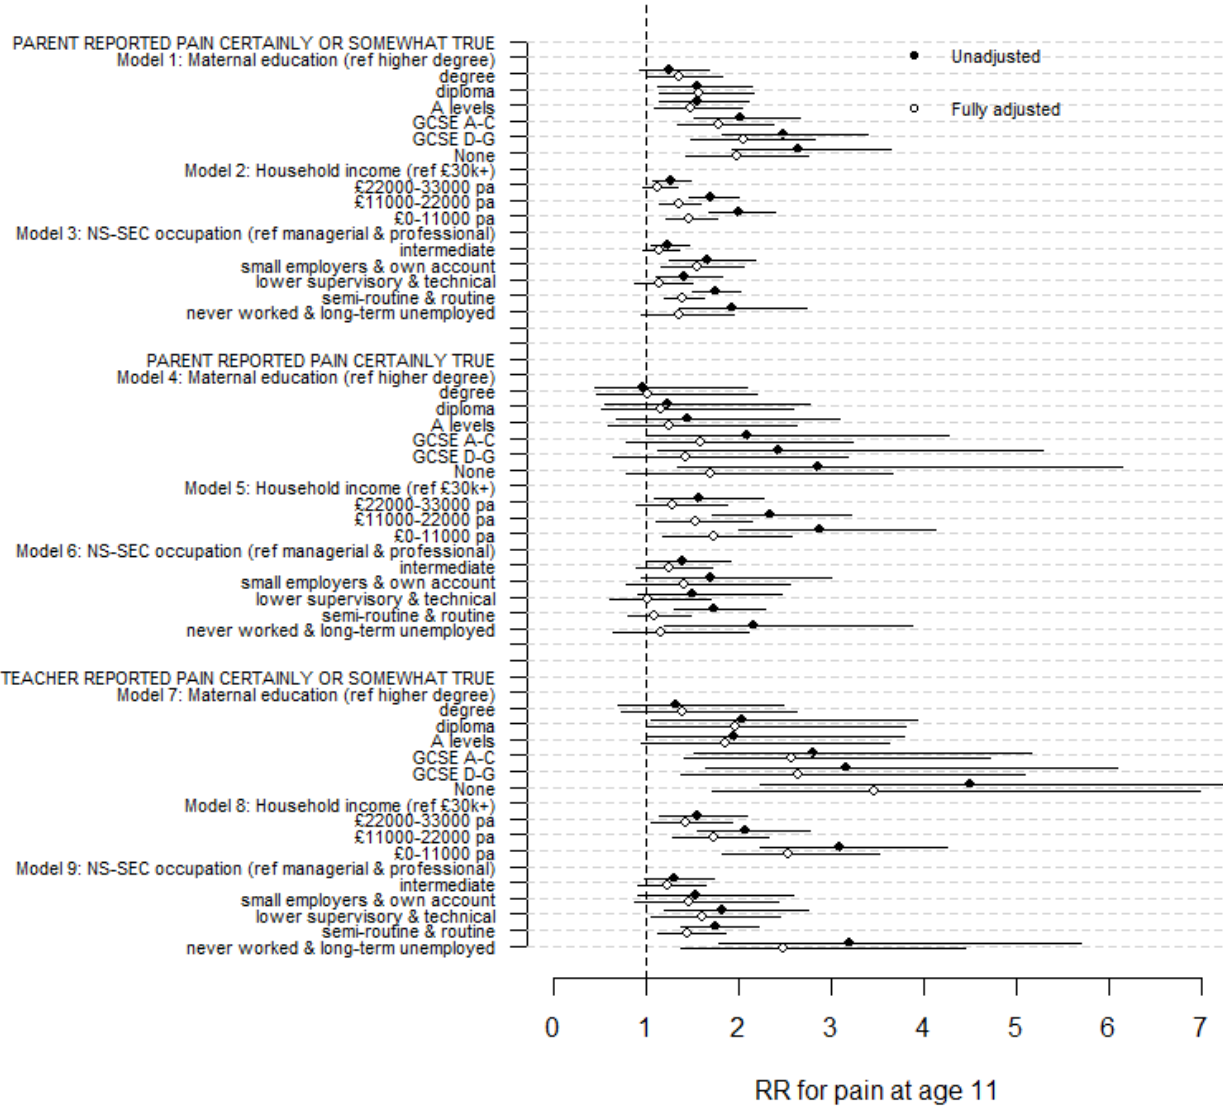

Error bars show 95% CIs around the survey estimates

**Table 6: Table showing results of sensitivity analysis excluding period of gestation, maternal mental health and BMI, showing risk ratios and 95% CIs**

|                                                         | Univariable |                | Multivariable |                |
|---------------------------------------------------------|-------------|----------------|---------------|----------------|
| <b>MATERNAL EDUCATION (at birth, ref higher degree)</b> |             |                |               |                |
| degree                                                  | 1.09        | (0.89 to 1.33) | 1.12          | (0.92 to 1.37) |
| diploma                                                 | 1.27 *      | (1.01 to 1.58) | 1.24          | (1.00 to 1.55) |
| A levels                                                | 1.27 *      | (1.03 to 1.57) | 1.22          | (0.99 to 1.50) |
| GCSE A-C                                                | 1.52 ***    | (1.27 to 1.84) | 1.42 ***      | (1.17 to 1.71) |
| GCSE D-G                                                | 1.71 ***    | (1.41 to 2.08) | 1.51 ***      | (1.24 to 1.84) |
| none                                                    | 1.82 ***    | (1.50 to 2.21) | 1.50 ***      | (1.24 to 1.83) |
| <b>SEX (ref male)</b>                                   |             |                |               |                |
| female                                                  | 1.33 ***    | (1.25 to 1.42) | 1.37 ***      | (1.28 to 1.46) |
| <b>ETHNICITY (ref white)</b>                            |             |                |               |                |
| mixed or other                                          | 1.09        | (0.93 to 1.28) | 1.04          | (0.89 to 1.21) |
| Asian                                                   | 1.26 ***    | (1.12 to 1.42) | 1.10          | (0.98 to 1.23) |
| black                                                   | 1.14        | (0.96 to 1.35) | 1.05          | (0.90 to 1.23) |
| <b>EATS SLEEPS REGULARLY (9 months, ref agree)</b>      |             |                |               |                |
| disagree or strongly disagree                           | 1.27 **     | (1.08 to 1.49) | 1.13          | (0.97 to 1.33) |
| <b>PROBLEMATIC CRYING (9 months, ref no)</b>            |             |                |               |                |
| yes                                                     | 1.25 ***    | (1.12 to 1.40) | 1.09          | (0.98 to 1.21) |
| <b>MATERNAL GI DISEASE (9 months, ref no)</b>           |             |                |               |                |
| yes                                                     | 1.35 ***    | (1.24 to 1.48) | 1.24 ***      | (1.13 to 1.35) |
| <b>MATERNAL HEALTH (5 years, ref excellent)</b>         |             |                |               |                |
| good                                                    | 1.25 ***    | (1.14 to 1.36) | 1.13 **       | (1.04 to 1.23) |
| fair                                                    | 1.65 ***    | (1.50 to 1.82) | 1.30 ***      | (1.18 to 1.44) |
| poor                                                    | 1.77 ***    | (1.48 to 2.10) | 1.28 **       | (1.07 to 1.54) |
| <b>MATERNAL AMOUNT BODILY PAIN (5 years, ref none)</b>  |             |                |               |                |
| very mild                                               | 1.16 **     | (1.06 to 1.26) | 1.15 **       | (1.05 to 1.25) |
| mild                                                    | 1.42 ***    | (1.30 to 1.55) | 1.31 ***      | (1.20 to 1.44) |
| moderate                                                | 1.50 ***    | (1.37 to 1.64) | 1.32 ***      | (1.20 to 1.45) |
| severe or very severe                                   | 1.51 ***    | (1.35 to 1.70) | 1.29 ***      | (1.14 to 1.46) |
| <b>CHILD SDQ (5 years, ref normal)</b>                  |             |                |               |                |
| borderline                                              | 1.50 ***    | (1.35 to 1.67) | 1.36 ***      | (1.22 to 1.51) |
| abnormal                                                | 1.73 ***    | (1.55 to 1.93) | 1.48 ***      | (1.32 to 1.65) |
| <b>DAILY FRUIT PORTIONS (5 years, ref none or one)</b>  |             |                |               |                |
| two                                                     | 0.89 *      | (0.81 to 0.98) | 0.94          | (0.85 to 1.03) |
| three or more                                           | 0.76 ***    | (0.70 to 0.83) | 0.86 ***      | (0.79 to 0.93) |

\*\*\*p < 0.001, \*\*p < 0.01, \*p < 0.05

Unweighted n=10624

**Figure 4: Plot of unadjusted and fully adjusted effect sizes in sensitivity analysis excluding variables that resulted in large amounts of missing data**

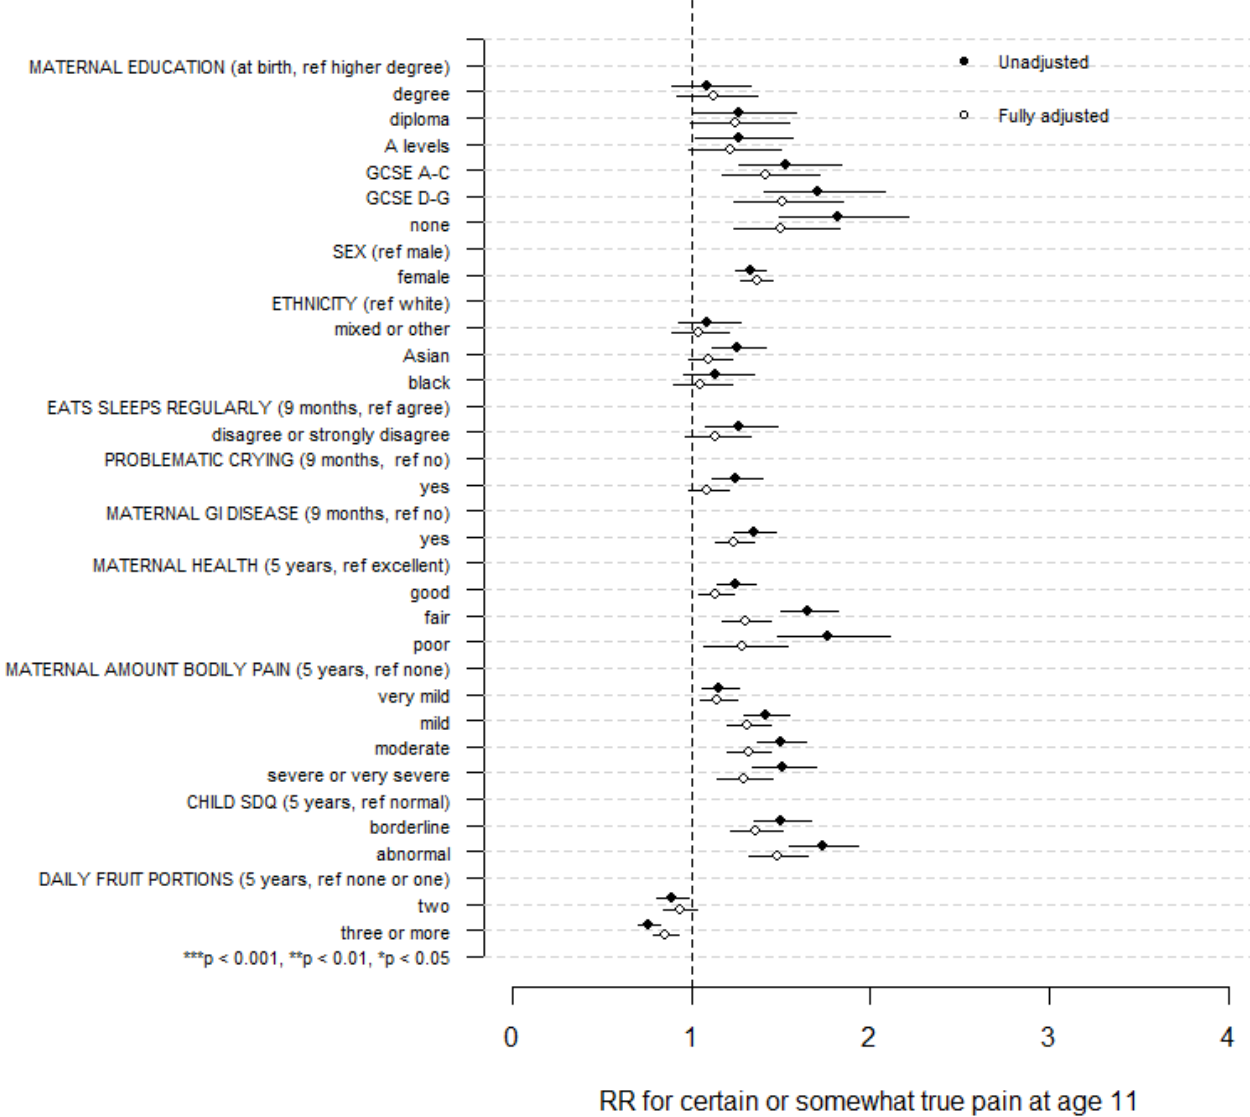

Error bars show 95% CIs around the survey estimates

**Table 7: Table showing results of sensitivity analysis using a measure of SDQ recalculated to exclude the frequent complaints of pain item in place of the SDQ, showing risk ratios and 95% CIs**

|                                                         | Univariable |                | Multivariable |                |
|---------------------------------------------------------|-------------|----------------|---------------|----------------|
| <b>MATERNAL EDUCATION (at birth, ref higher degree)</b> |             |                |               |                |
| degree                                                  | 1.16        | (0.93 to 1.44) | 1.21          | (0.98 to 1.50) |
| diploma                                                 | 1.40**      | (1.10 to 1.78) | 1.38**        | (1.08 to 1.75) |
| A levels                                                | 1.35*       | (1.07 to 1.70) | 1.29*         | (1.02 to 1.62) |
| GCSE A-C                                                | 1.59***     | (1.29 to 1.95) | 1.45***       | (1.18 to 1.79) |
| GCSE D-G                                                | 1.83***     | (1.46 to 2.30) | 1.57***       | (1.24 to 1.99) |
| none                                                    | 2.06***     | (1.64 to 2.59) | 1.69***       | (1.34 to 2.12) |
| <b>SEX (ref male)</b>                                   |             |                |               |                |
| female                                                  | 1.31***     | (1.21 to 1.42) | 1.35***       | (1.25 to 1.46) |
| <b>ETHNICITY (ref white)</b>                            |             |                |               |                |
| mixed or other                                          | 1.06        | (0.86 to 1.31) | 0.98          | (0.79 to 1.21) |
| Asian                                                   | 1.10        | (0.92 to 1.31) | 0.98          | (0.82 to 1.16) |
| black                                                   | 1.39**      | (1.11 to 1.73) | 1.27*         | (1.01 to 1.58) |
| <b>GESTATION (ref term)</b>                             |             |                |               |                |
| premature                                               | 1.03        | (0.88 to 1.21) | 0.00***       | (0.00 to 0.00) |
| <b>EATS SLEEPS REGULARLY (9 months, ref agree)</b>      |             |                |               |                |
| disagree or strongly disagree                           | 1.20        | (0.97 to 1.48) | 1.14          | (0.93 to 1.40) |
| <b>PROBLEMATIC CRYING (9 months, ref no)</b>            |             |                |               |                |
| yes                                                     | 1.30***     | (1.14 to 1.47) | 1.10          | (0.97 to 1.25) |
| <b>MATERNAL GI DISEASE (9 months, ref no)</b>           |             |                |               |                |
| yes                                                     | 1.36***     | (1.23 to 1.49) | 1.25***       | (1.13 to 1.38) |
| <b>MATERNAL KESSLER SCALE (3 years, ref normal)</b>     |             |                |               |                |
| distressed                                              | 1.61***     | (1.50 to 1.73) | 1.34***       | (1.24 to 1.45) |
| <b>MATERNAL HEALTH (5 years, ref excellent)</b>         |             |                |               |                |
| good                                                    | 1.25***     | (1.14 to 1.38) | 1.11*         | (1.01 to 1.23) |
| fair                                                    | 1.66***     | (1.49 to 1.85) | 1.22***       | (1.09 to 1.37) |
| poor                                                    | 1.90***     | (1.55 to 2.34) | 1.22          | (0.99 to 1.52) |
| <b>MATERNAL AMOUNT BODILY PAIN (5 years, ref none)</b>  |             |                |               |                |
| very mild                                               | 1.17**      | (1.06 to 1.30) | 1.15**        | (1.05 to 1.27) |
| mild                                                    | 1.40***     | (1.27 to 1.55) | 1.29***       | (1.16 to 1.44) |
| moderate                                                | 1.49***     | (1.34 to 1.67) | 1.28***       | (1.14 to 1.43) |
| severe or very severe                                   | 1.48***     | (1.29 to 1.69) | 1.22**        | (1.06 to 1.40) |
| <b>CHILD SDQ RECONSTRUCTED (5 years, ref normal)</b>    |             |                |               |                |
| borderline                                              | 1.56***     | (1.37 to 1.78) | 1.32***       | (1.14 to 1.51) |
| abnormal                                                | 1.75***     | (1.49 to 2.04) | 1.40***       | (1.18 to 1.66) |
| <b>BMI (7 years, ref normal or underweight)</b>         |             |                |               |                |
| overweight                                              | 1.14**      | (1.04 to 1.25) | 1.06          | (0.96 to 1.16) |
| obese                                                   | 1.31***     | (1.15 to 1.50) | 1.17*         | (1.02 to 1.34) |
| <b>DAILY FRUIT PORTIONS (5 years, ref none or one)</b>  |             |                |               |                |
| two                                                     | 0.86**      | (0.77 to 0.96) | 0.93          | (0.83 to 1.04) |
| three or more                                           | 0.74***     | (0.68 to 0.81) | 0.87**        | (0.79 to 0.95) |

\*\*\*p < 0.001, \*\*p < 0.01, \*p < 0.05. Unweighted n=8463

**Figure 5: Plot showing results of sensitivity analysis with SDQ recalculated to exclude the frequent complaints of pain item in place of the SDQ covariate, showing risk ratios and 95% CIs**

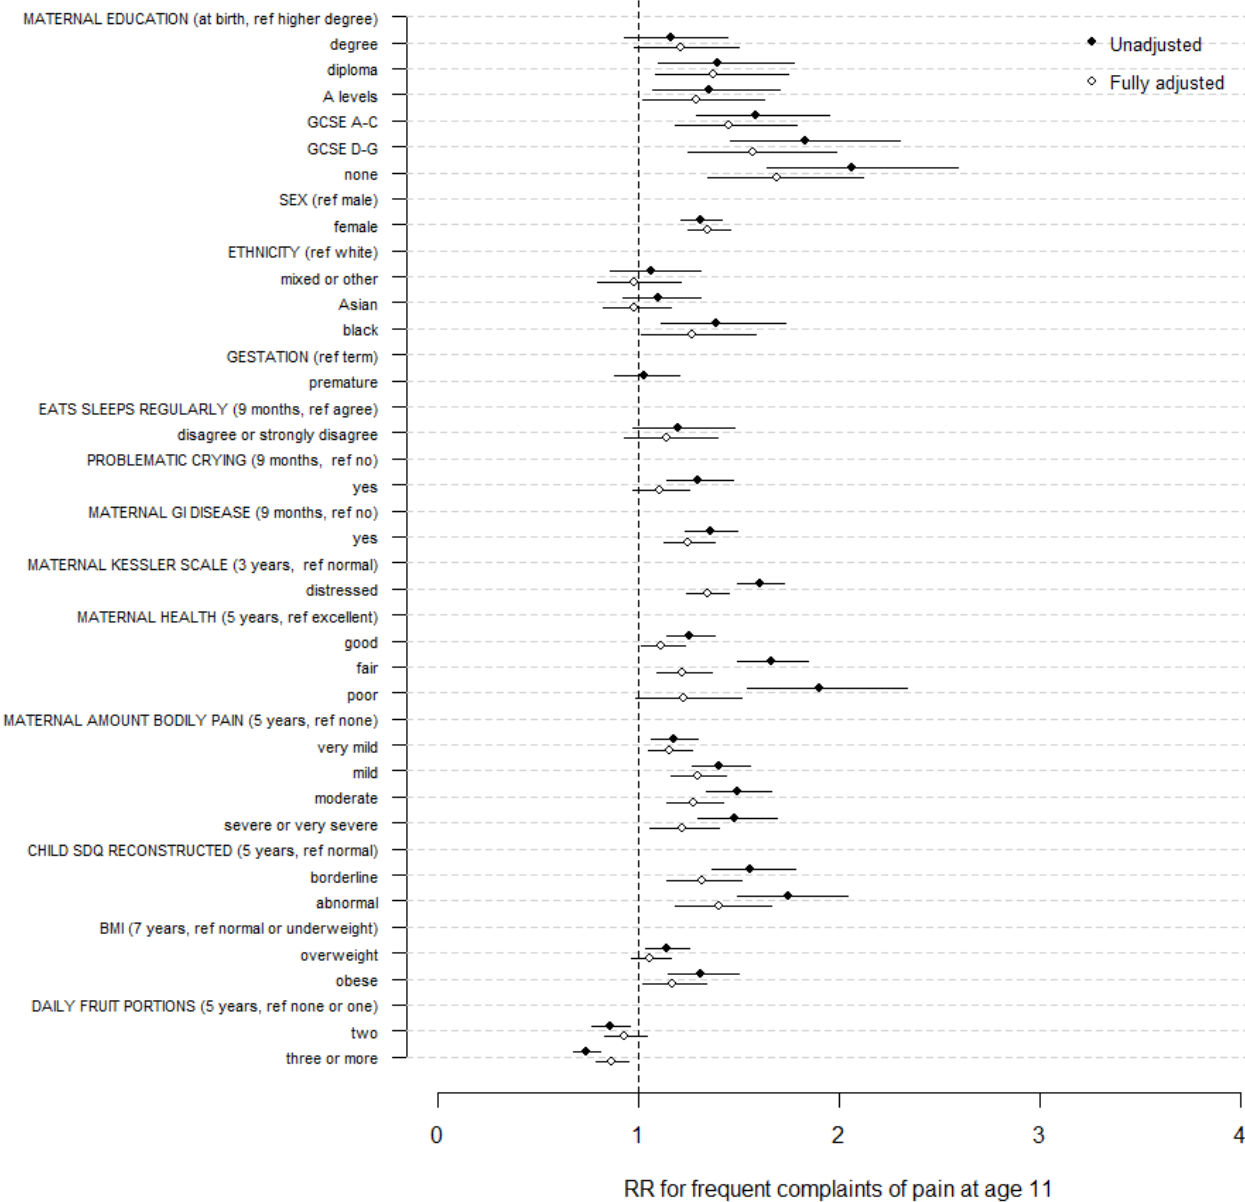

Supplement: bmjpo-2017-000093supp001.pdf [file bmjpo-2017-000093supp001.pdf]
